# Supplementary material for: UManSysProp v1.0: an online and open-source facility for molecular property prediction and atmospheric aerosol calculations
Source: Copernicus journal article supplement (doi:10.5194/gmd-9-899-2016), 2016-03-01
Supplement: Supplementary file [file gmd-9-899-2016-supplement-title-page.pdf › gmd-9-899-2016-supplement-title-page.pdf]

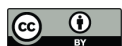

## *Supplement of*

# **UManSysProp v1.0: an online and open-source facility for molecular property prediction and atmospheric aerosol calculations**

**David Topping et al.**

*Correspondence to:* David Topping ([david.topping@manchester.ac.uk](mailto:david.topping@manchester.ac.uk))

- [gmd-9-899-2016-supplement-title-page.pdf](#)
- [Table\\_A1.txt](#)
- [Table\\_A2.txt](#)
- [Table\\_A3.txt](#)

The copyright of individual parts of the supplement might differ from the CC-BY 3.0 licence.
